# Supplementary material
Source: MDPI journal article supplement (https://www.mdpi.com/2073-4441/13/12/1615)
Supplement: s1 [file s1]

## Supplementary Data

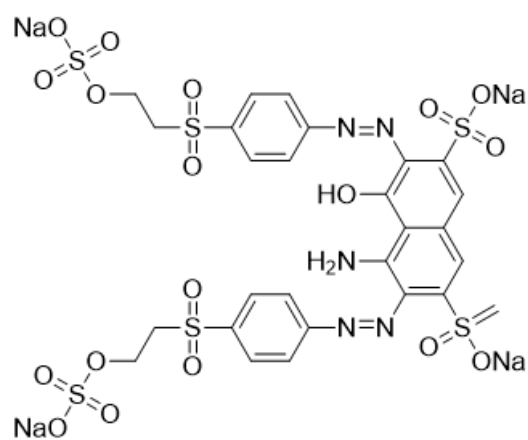

**Figure S1.** The structural formula of RB5.

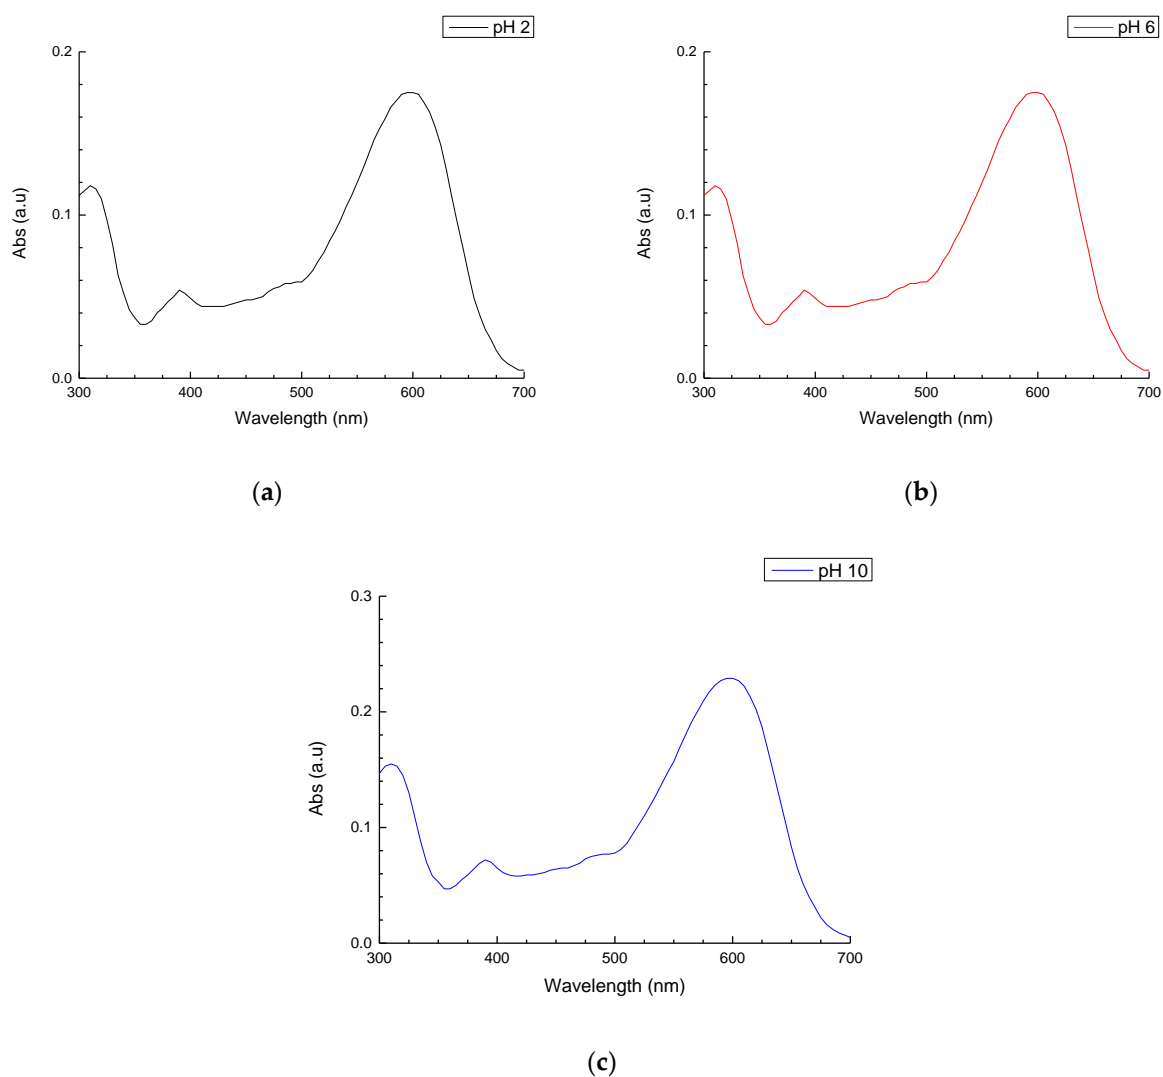

**Figure S2.** UV-Vis absorption spectra of RB5 at (a) pH 2, (b) pH 6, and (c) pH 10.

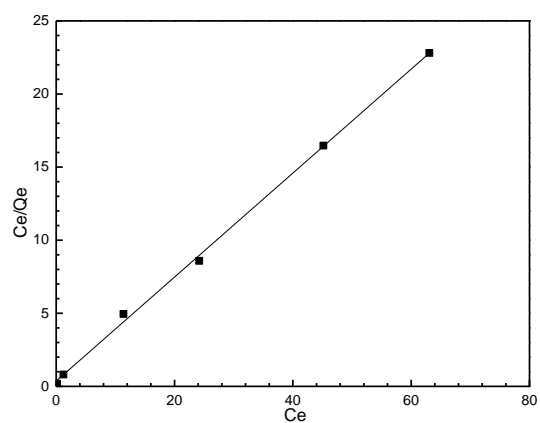

(a)

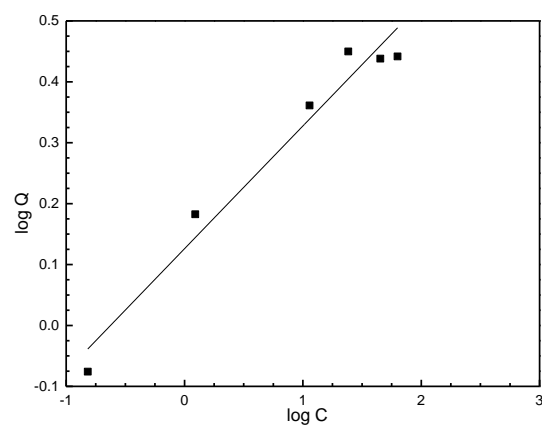

(b)

**Figure S3.** Adsorption isotherms for adsorption of RB5 on UBC (a) Langmuir and (b) Freundlich.
